# Supplementary material for: The Possible Role of Resource Requirements and Academic Career-Choice Risk on Gender Differences in Publication Rate and Impact
Source: PLOS journal article supplement (doi:10.1371/journal.pone.0051332), 2012-12-12
Supplement: S5 (10.1371/journal.pone.0051332.s005) [file journal.pone.0051332.s005]

**Table S 1. Gender of faculty in Chemical Engineering departments.**

| <b>Department</b>                               | <b>Male</b> | <b>Female</b> |
|-------------------------------------------------|-------------|---------------|
| California Institute of Technology              | 7           | 3             |
| Carnegie Mellon University                      | 19          | 4             |
| Cornell University                              | 16          | 1             |
| Georgia Institute of Technology                 | 31          | 7             |
| Johns Hopkins University                        | 11          | 2             |
| Massachusetts Institute of Technology           | 35          | 4             |
| North Carolina State University                 | 22          | 2             |
| Northwestern University                         | 14          | 3             |
| Ohio State University                           | 14          | 3             |
| Pennsylvania State University                   | 18          | 4             |
| Princeton University                            | 19          | 3             |
| Purdue University                               | 23          | 4             |
| Rensselaer Polytechnic Institute                | 16          | 1             |
| Rice University                                 | 13          | 5             |
| Stanford University                             | 17          | 3             |
| University of California, Berkeley              | 15          | 3             |
| University of California, Davis                 | 20          | 7             |
| University of California, Los Angeles           | 11          | 2             |
| University of California, Santa Barbara         | 17          | 2             |
| University of Colorado                          | 18          | 4             |
| University of Delaware                          | 20          | 4             |
| University of Florida                           | 20          | 2             |
| University of Illinois at Urbana Champaign      | 17          | 3             |
| University of Massachusetts Amherst             | 15          | 3             |
| University of Michigan                          | 18          | 5             |
| University of Minnesota at Minneapolis St. Paul | 30          | 3             |
| University of Notre Dame                        | 17          | 3             |
| University of Pennsylvania                      | 21          | 2             |
| University of Texas at Austin                   | 21          | 2             |
| University of Washington                        | 15          | 2             |
| University of Wisconsin at Madison              | 17          | 2             |
| <b>Total</b>                                    | <b>567</b>  | <b>98</b>     |
