# Supplementary material for: The Possible Role of Resource Requirements and Academic Career-Choice Risk on Gender Differences in Publication Rate and Impact
Source: PLOS journal article supplement (doi:10.1371/journal.pone.0051332), 2012-12-12
Supplement: S6 (10.1371/journal.pone.0051332.s006) [file journal.pone.0051332.s006]

**Table S 2. Gender of faculty in Chemistry departments.**

| <b>Department</b>                               | <b>Male</b>  | <b>Female</b> |
|-------------------------------------------------|--------------|---------------|
| Boston University                               | 20           | 3             |
| California Institute of Technology              | 21           | 5             |
| Carnegie Mellon University                      | 24           | 5             |
| Cornell University                              | 23           | 3             |
| Duke University                                 | 24           | 3             |
| Emory University                                | 18           | 2             |
| Georgia Institute of Technology                 | 38           | 4             |
| Harvard University                              | 20           | 4             |
| Johns Hopkins University                        | 20           | 1             |
| Massachusetts Institute of Technology           | 25           | 7             |
| North Carolina State University                 | 22           | 6             |
| Northwestern University                         | 26           | 4             |
| Ohio State University                           | 33           | 8             |
| Pennsylvania State University                   | 30           | 6             |
| Princeton University                            | 17           | 3             |
| Purdue University                               | 40           | 15            |
| Rensselaer Polytechnic Institute                | 19           | 3             |
| Rice University                                 | 19           | 3             |
| Stanford University                             | 20           | 3             |
| University of California, Berkeley              | 50           | 8             |
| University of California, Davis                 | 28           | 10            |
| University of California, Los Angeles           | 43           | 11            |
| University of California, Santa Barbara         | 36           | 4             |
| University of Colorado                          | 43           | 8             |
| University of Delaware                          | 25           | 7             |
| University of Florida                           | 38           | 6             |
| University of Illinois at Urbana Champaign      | 37           | 7             |
| University of Massachusetts Amherst             | 23           | 4             |
| University of Michigan                          | 36           | 13            |
| University of Minnesota at Minneapolis St. Paul | 36           | 6             |
| University of Notre Dame                        | 30           | 5             |
| University of Pennsylvania                      | 28           | 6             |
| University of Texas at Austin                   | 41           | 5             |
| University of Washington                        | 31           | 4             |
| University of Wisconsin at Madison              | 40           | 6             |
| <b>Total</b>                                    | <b>1,024</b> | <b>198</b>    |
