# Supplementary material for: The Possible Role of Resource Requirements and Academic Career-Choice Risk on Gender Differences in Publication Rate and Impact
Source: PLOS journal article supplement (doi:10.1371/journal.pone.0051332), 2012-12-12
Supplement: S8 (10.1371/journal.pone.0051332.s008) [file journal.pone.0051332.s008]

**Table S 4. Gender of faculty in Industrial Engineering departments.**

| <b>Department</b>                               | <b>Male</b> | <b>Female</b> |
|-------------------------------------------------|-------------|---------------|
| Cornell University                              | 19          | 1             |
| Georgia Institute of Technology                 | 47          | 10            |
| North Carolina State University                 | 19          | 1             |
| Northwestern University                         | 17          | 1             |
| Pennsylvania State University                   | 19          | 3             |
| Purdue University                               | 17          | 2             |
| Stanford University                             | 27          | 7             |
| University of California, Berkeley              | 15          | 4             |
| University of Florida                           | 14          | 1             |
| University of Illinois at Urbana Champaign      | 17          | 4             |
| University of Michigan                          | 23          | 4             |
| University of Minnesota at Minneapolis St. Paul | 6           | 2             |
| University of Texas at Austin                   | 6           | 1             |
| University of Washington                        | 4           | 4             |
| University of Wisconsin at Madison              | 12          | 6             |
| <b>Total</b>                                    | <b>262</b>  | <b>51</b>     |
