# Supplementary material for: The Possible Role of Resource Requirements and Academic Career-Choice Risk on Gender Differences in Publication Rate and Impact
Source: PLOS journal article supplement (doi:10.1371/journal.pone.0051332), 2012-12-12
Supplement: S9 (10.1371/journal.pone.0051332.s009) [file journal.pone.0051332.s009]

**Table S 5. Gender of faculty in Material Science departments.**

| <b>Department</b>                          | <b>Male</b> | <b>Female</b> |
|--------------------------------------------|-------------|---------------|
| Boston University                          | 23          | 8             |
| California Institute of Technology         | 8           | 3             |
| Carnegie Mellon University                 | 17          | 2             |
| Cornell University                         | 14          | 3             |
| Duke University                            | 21          | 4             |
| Georgia Institute of Technology            | 31          | 9             |
| Johns Hopkins University                   | 10          | 2             |
| Massachusetts Institute of Technology      | 19          | 6             |
| North Carolina University                  | 12          | 4             |
| Northwestern University                    | 30          | 5             |
| Ohio State University                      | 21          | 4             |
| Pennsylvania State University              | 20          | 4             |
| Purdue University                          | 13          | 2             |
| Rensselaer Polytechnic Institute           | 9           | 2             |
| Rice University                            | 14          | 1             |
| Stanford University                        | 13          | 1             |
| University of California, Berkeley         | 18          | 7             |
| University of California, Los Angeles      | 17          | 2             |
| University of California, Santa Barbara    | 31          | 3             |
| University of Delaware                     | 12          | 2             |
| University of Florida                      | 34          | 6             |
| University of Illinois at Urbana Champaign | 19          | 4             |
| University of Michigan                     | 26          | 5             |
| University of Pennsylvania                 | 15          | 5             |
| University of Washington                   | 12          | 3             |
| University of Wisconsin at Madison         | 16          | 4             |
| <b>Total</b>                               | <b>475</b>  | <b>101</b>    |
