# Supplementary material for: The Possible Role of Resource Requirements and Academic Career-Choice Risk on Gender Differences in Publication Rate and Impact
Source: PLOS journal article supplement (doi:10.1371/journal.pone.0051332), 2012-12-12
Supplement: S11 (10.1371/journal.pone.0051332.s011) [file journal.pone.0051332.s011]

**Table S 7. Gender of faculty in Psychology departments.**

| <b>Department</b>                        | <b>Male</b> | <b>Female</b> |
|------------------------------------------|-------------|---------------|
| Harvard University                       | 17          | 9             |
| Princeton University                     | 19          | 11            |
| Stanford University                      | 21          | 11            |
| University of California, Berkeley       | 19          | 12            |
| University of California, Los Angeles    | 41          | 26            |
| University of Illinois, Urbana Champaign | 35          | 21            |
| University of Michigan                   | 65          | 46            |
| University of Minnesota at Minneapolis   | 33          | 8             |
| University of Wisconsin at Madison       | 18          | 18            |
| Yale University                          | 14          | 11            |
| <b>Total</b>                             | <b>282</b>  | <b>173</b>    |
