# Supplementary material for: The Possible Role of Resource Requirements and Academic Career-Choice Risk on Gender Differences in Publication Rate and Impact
Source: PLoS One. 2012 Dec 12;7(12):e51332. doi: 10.1371/journal.pone.0051332 (PMC3520933; doi:10.1371/journal.pone.0051332)
Supplement: Table S3 — Gender of faculty in Ecology departments. (PDF) [file pone.0051332.s007.pdf]

**Table S 3. Gender of faculty in Ecology departments.**

| <b>Department</b>                          | <b>Male</b> | <b>Female</b> |
|--------------------------------------------|-------------|---------------|
| Cornell University                         | 19          | 6             |
| Duke University                            | 24          | 7             |
| Harvard University                         | 8           | 3             |
| Pennsylvania State University              | 41          | 17            |
| Princeton University                       | 14          | 2             |
| Rice University                            | 9           | 4             |
| Stanford University                        | 12          | 6             |
| University of California, Berkeley         | 33          | 10            |
| University of Chicago                      | 17          | 3             |
| University of Georgia                      | 20          | 4             |
| University of Illinois at Urbana Champaign | 54          | 18            |
| University of Michigan                     | 37          | 14            |
| University of Texas at Austin              | 11          | 5             |
| University of Washington                   | 4           | 2             |
| University of Wisconsin at Madison         | 26          | 5             |
| <b>Total</b>                               | <b>329</b>  | <b>108</b>    |
